# Supplementary material
Source: PubMed Central journal article supplement (PMC11028602)
Supplement: 262_2013_1454_MOESM1_ESM.pdf [file 262_2013_1454_MOESM1_ESM.pdf]

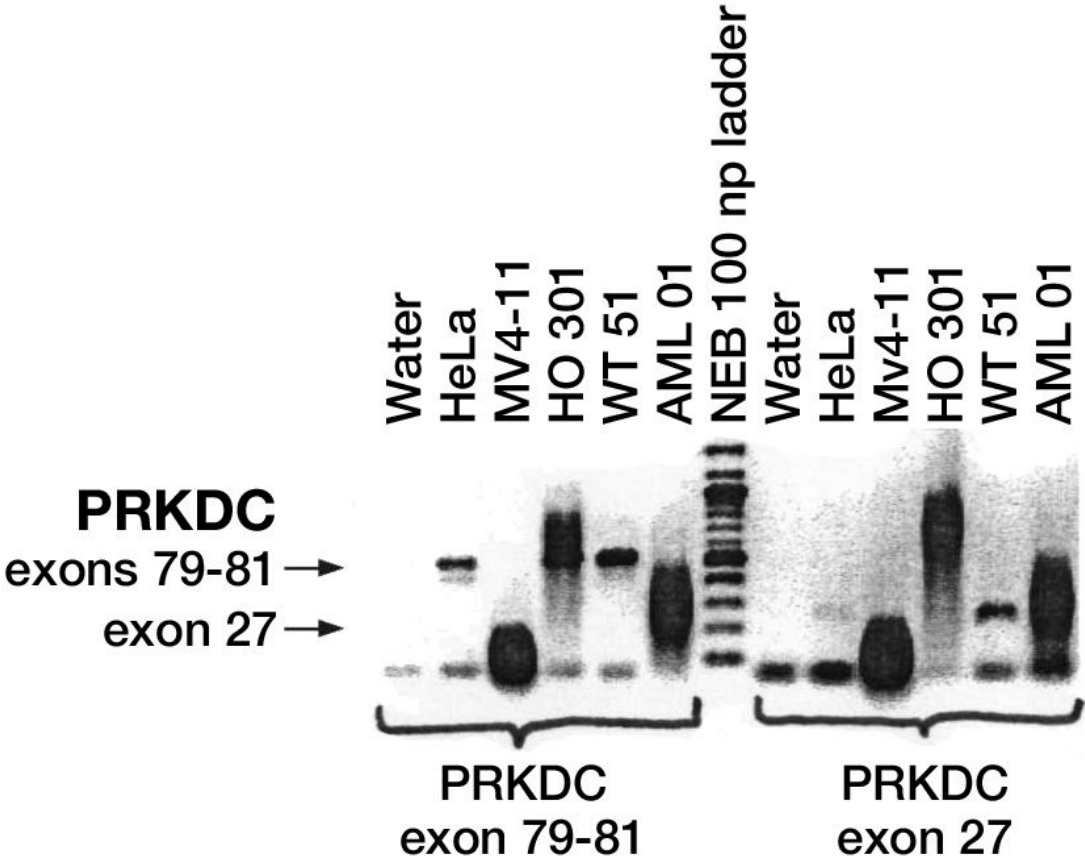

Supplemental Figure 1: mRNA expression of PRKDC in different tumor cell lines. Both transcripts of PRKDC could be detected in the EBV-transformed B cell line WT51.

Cancer Immunology, Immunotherapy (submitted in 2013) – A. Neumann *et al.*

Supplemental Table 1: HLA ligands characterized after elution from immunopurified HLA molecules of lung cancer tissue.

| Peptide      | HLA  | gene symbol | gene                                                                                    | cancer associated (ref. / PMID) | n-fold overexpression |        |        |        |        |        |
|--------------|------|-------------|-----------------------------------------------------------------------------------------|---------------------------------|-----------------------|--------|--------|--------|--------|--------|
|              |      |             |                                                                                         |                                 | LCA008                | LCA010 | LCA011 | LCA018 | LCA020 | LCA021 |
| VHYDRSGRSL   | B*14 | THOC4       | THO complex 4                                                                           | n                               | n.a.                  |        |        |        |        |        |
| NTDRNIDKY    | A*01 | C3orf63     | chromosome 3 open reading frame 63 (retinoblastoma-associated protein 140)              | n                               | 1.6                   | 1.5    | 1.3    | 1.4    | 0.9    | 1.1    |
| ILDKKVEKV    | A*02 | HSP90AB1    | heat shock protein 90kDa alpha (cytosolic), class B member 1                            | 19047110                        | 0.5                   | 1.0    | 0.8    | 0.9    | 0.4    | 0.6    |
| ERAIHQAL     | B*14 | CYP1B1      | cytochrome P450, family 1, subfamily B, polypeptide 1                                   | 19690133                        | 0.9                   | 0.2    | 1.9    | 1.7    | 9.2    | 0.2    |
| DVAALHKAI    | A*02 | ANXA1       | annexin A1                                                                              | 16899607                        | 0.8                   | 0.1    | 1.2    | 1.7    | 1.4    | 0.2    |
| VLASMFHVTL   | A*02 | CLEC12A     | C-type lectin domain family 12, member A                                                | n                               | n.a.                  |        |        |        |        |        |
| DQLRHGGL     | n.a. | SGTA        | small glutamine-rich tetratricopeptide repeat (TPR)-containing, alpha                   | n                               | 0.1                   | 0.4    | 0.3    | 0.3    | 0.2    | 0.2    |
| HPISDHEATL   | B*35 | HLA-A       | major histocompatibility complex, class I, A                                            | n                               | 2.3                   | 2.1    | 3.7    | 0.9    | 1.3    | 0.8    |
| RQDVNASL     | n.a. | VIM         | vimentin                                                                                | n                               | 0.5                   | 0.2    | 0.9    | 0.4    | 1.5    | 0.5    |
| DRRERVCLK    | B*14 | EAF2        | ELL associated factor 2 (testosterone regulated apoptosis inducer and tumor suppressor) | 12907652                        | 1.0                   | 0.3    | 0.7    | 0.7    | 1.5    | 0.4    |
| NGATRKLAL    | n.a. | DNAJA1      | DnaJ (Hsp40) homolog, subfamily A, member 1                                             | n                               | 0.5                   | 0.5    | 0.9    | 0.9    | 0.3    | 0.3    |
| VTEIDQDKY    | A*01 | FLNA        | filamin A, alpha (actin binding protein 280)                                            | 19690385                        | 0.5                   | 0.2    | 1.1    | 0.5    | 1.1    | 5.7    |
| ALADGVQKV    | A*02 | APOL1       | apolipoprotein L, 1                                                                     | n                               | 0.6                   | 0.1    | 0.4    | 0.4    | 0.4    | 0.1    |
| KMAGIGIREA   | A*02 | KRT15       | keratin 15                                                                              | n                               | 90.5                  | 1.3    | 6.5    | 0.6    | 0.0    | 0.0    |
| QENSDDYQSNLA | n.a. | HNRNPH2     | heterogeneous nuclear ribonucleoprotein H2 (H')                                         | n                               | 1.4                   | 1.1    | 1.1    | 0.8    | 1.1    | 1.2    |
| NTEEEGLKY    | A*01 | BCLAF1      | BCL2-associated transcription factor 1                                                  | n                               | 6.5                   | 6.5    | 4.9    | 3.2    | 4.6    | 2.8    |
| NTDSPLRY     | A*01 | RPSA        | ribosomal protein SA                                                                    | 12386810                        | 0.9                   | 0.9    | 0.8    | 1.1    | 0.9    | 0.8    |
| ERVVHYEI     | B*14 | NDUFB8      | NADH dehydrogenase (ubiquinone) 1                                                       | n                               | 0.7                   | 0.7    | 0.7    | 0.8    | 0.8    | 1.3    |

|             |      |          |                                                                                         |                     |      |      |     |     |      |     |
|-------------|------|----------|-----------------------------------------------------------------------------------------|---------------------|------|------|-----|-----|------|-----|
|             |      |          | beta subcomplex, 8, 19kDa                                                               |                     |      |      |     |     |      |     |
| RPFERTITM   | B*35 | SDCBP    | syndecan binding protein (syntenin)<br>(Melanoma differentiation- associated protein 9) | 18832467            | 0.5  | 0.4  | 0.7 | 0.9 | 0.9  | 0.4 |
| IADMGHLKY   | A*01 | PCNA     | proliferating cell nuclear antigen                                                      | (18), (28)          | 4.9  | 5.3  | 3.5 | 7.5 | 2.8  | 1.6 |
| SRIARALAL   | B*14 | CYR61    | cysteine-rich, angiogenic inducer, 61                                                   | 11751417            | 0.5  | 0.1  | 0.7 | 0.2 | 1.2  | 0.6 |
| RFDHVITNM   | n.a. | C1QB     | complement component 1, q<br>subcomponent, B chain                                      | n                   | 1.7  | 0.3  | 4.0 | 2.8 | 3.7  | 0.3 |
| LTDRELECY   | A*01 | ADD1     | adducin 1 (alpha)                                                                       | n                   | 0.9  | 0.7  | 1.2 | 0.8 | 1.2  | 2.6 |
| RLASYLDKV   | A*02 | KRT17    | keratin 17                                                                              | 16638858            | 42.2 | 0.1  | 0.1 | 1.2 | 1.1  | 0.1 |
| DRVLRAML    | B*14 | CCND1    | cyclin D1                                                                               | (19), (29),<br>(30) | 1.6  | 4.9  | 4.9 | 0.4 | 4.3  | 1.4 |
| LRFQSSAVM   | B*14 | HIST1H3B | histone cluster 1, H3b                                                                  | n                   | 0.9  | 2.0  | 1.9 | 0.7 | 1.6  | 0.2 |
| DRVAHILL    | B*14 | VPS16    | vacuolar protein sorting 16 homolog<br>(S. cerevisiae)                                  | n                   | 1.5  | 1.4  | 1.9 | 3.0 | 2.0  | 1.3 |
| YIDEQFERY   | A*01 | SEPT2    | septin 2                                                                                | 16682951            | 1.6  | 1.6  | 2.0 | 1.1 | 2.0  | 1.1 |
| NRFPVNSL    | B*14 | GOSR1    | golgi SNAP receptor complex member<br>1                                                 | n                   | 2.1  | 1.5  | 3.0 | 1.2 | 2.0  | 2.5 |
| VTELVHVISY  | A*01 | RNF213   | ring finger protein 213                                                                 | n                   | n.a. |      |     |     |      |     |
| DTDHYFLRY   | A*01 | PIGT     | phosphatidylinositol glycan anchor<br>biosynthesis, class T                             | n                   | 0.9  | 4.0  | 1.5 | 1.9 | 1.5  | 1.4 |
| DRVALRNLL   | B*14 | HLA-F    | major histocompatibility complex, class<br>I, F                                         | n                   | 0.6  | 0.6  | 1.1 | 0.7 | 0.7  | 0.3 |
| VMAPRTLVL   | E    | HLA-A    | major histocompatibility complex, class<br>I, A                                         | n                   | 2.3  | 2.1  | 3.7 | 0.9 | 1.3  | 0.8 |
| DRYISKMFL   | B*14 | SNRPD2   | small nuclear ribonucleoprotein D2<br>polypeptide 16.5kDa                               | n                   | 1.7  | 2.0  | 1.5 | 1.4 | 1.2  | 1.2 |
| DRFLRQLDF   | B*14 | COPA     | coatamer protein complex, subunit<br>alpha                                              | n                   | 1.5  | 1.1  | 1.4 | 1.3 | 1.1  | 0.9 |
| MPVGPDAILRY | B*35 | BAT3     | HLA-B associated transcript 3                                                           | 18978787            | 0.9  | 1.9  | 1.7 | 1.9 | 1.1  | 1.6 |
| FLALLAGAHA  | A*02 | PLTP     | phospholipid transfer protein                                                           | n                   | 4.6  | 0.9  | 6.5 | 1.2 | 17.1 | 2.1 |
| FGGRNPFDTF  | n.a. | DNAJB1   | DnaJ (Hsp40) homolog, subfamily B,<br>member 1                                          | n                   | 0.5  | 0.2  | 0.3 | 0.3 | 0.1  | 0.1 |
| VLIENVASL   | A*02 | GPX2     | glutathione peroxidase 2<br>(gastrointestinal)                                          | 19047153            | 73.5 | 42.2 | 0.8 | 0.5 | 0.2  | 0.4 |
| TLSDLRVYL   | A*02 | SRXN1    | sulfiredoxin 1 homolog (S. cerevisiae)                                                  | n                   | n.a. |      |     |     |      |     |
| VLWDRTFSL   | A*02 | STAT1    | signal transducer and activator of<br>transcription 1, 91kDa                            | (25) - (27)         | 7.0  | 2.6  | 9.2 | 5.7 | 2.5  | 0.6 |

|               |          |          |                                                                      |          |      |      |     |     |     |     |
|---------------|----------|----------|----------------------------------------------------------------------|----------|------|------|-----|-----|-----|-----|
| DPFKDIILY     | B*35     | BZW1     | basic leucine zipper and W2 domains 1                                | n        | 1.2  | 1.9  | 1.6 | 1.1 | 1.2 | 0.5 |
| VRFLGNLVL     | B*14     | RRAGB    | Ras-related GTP binding B                                            | n        | 0.9  | 0.9  | 1.1 | 0.7 | 1.9 | 2.1 |
| SIIGRLLEV     | A*02     | PPP1CA   | protein phosphatase 1, catalytic subunit, alpha isoform              | n        | 0.9  | 0.9  | 1.7 | 1.0 | 0.8 | 0.3 |
| LPFLPSTEDVY   | B*35     | HLA-DQA1 | major histocompatibility complex, class II, DQ alpha 1               | n        | 2.6  | 0.2  | 0.0 | 1.0 | 2.1 | 0.1 |
| FVHDLVLYL     | A*02     | CLTC     | clathrin, heavy chain (Hc)                                           | n        | 1.3  | 0.9  | 1.7 | 0.8 | 1.1 | 0.9 |
| KLLEPVLLL     | A*02     | RPS16    | ribosomal protein S16                                                | n        | 0.8  | 0.8  | 0.7 | 0.8 | 0.6 | 0.8 |
| DPVHKLLTL     | B*35     | KIAA0317 | KIAA0317                                                             | n        | 1.1  | 1.4  | 1.2 | 1.1 | 1.1 | 0.7 |
| TLADIIARL     | A*02     | NYNRIN   | NYN domain and retroviral integrase containing                       | n        | 0.6  | 0.4  | 0.8 | 0.1 | 0.4 | 0.4 |
| GLWHDVIFI     | A*02     | LAMA4    | laminin, alpha 4                                                     | 15915502 | 1.1  | 0.5  | 2.8 | 0.9 | 6.5 | 6.1 |
| WRFPGLLL      | B*14     | CD46     | CD46 molecule, complement regulatory protein                         | 14712499 | 1.2  | 1.3  | 1.7 | 2.1 | 0.4 | 0.1 |
| MRLSLPLLL     | B*14     | MGC29506 | hypothetical protein MGC29506 (proapoptotic caspase adaptor protein) | 12792799 | 9.2  | 0.2  | 1.2 | 3.5 | 9.8 | 0.0 |
| PTASPFPLLLL   | n.a.     | SEMA4F   | semaphorin 4F                                                        | n        | 1.9  | 1.1  | 2.0 | 1.1 | 1.3 | 0.7 |
| AVASFPKKQE    | artefact | COX7A2   | cytochrome c oxidase subunit VIIa polypeptide 2 (liver)              | n        | 0.9  | 1.1  | 0.8 | 0.7 | 0.8 | 0.9 |
| ILDKKVEKV     | A*02     | HSP90AB1 | heat shock protein 90kDa alpha (cytosolic), class B member 1         | 19047110 | 0.5  | 1.0  | 0.8 | 0.9 | 0.4 | 0.6 |
| FVQMMTAK      | n.a.     | CALM3    | calmodulin 3 (phosphorylase kinase, delta)                           | n        | 1.3  | 2.0  | 2.6 | 1.4 | 3.7 | 4.3 |
| QRFSHQTL      | B*14     | MED12    | mediator complex subunit 12                                          | n        | 0.8  | 1.5  | 0.9 | 0.9 | 0.4 | 0.8 |
| TRLESRTQL     | B*14     | SUPT6H   | suppressor of Ty 6 homolog (S. cerevisiae)                           | n        | 3.0  | 1.4  | 3.5 | 1.9 | 2.5 | 2.8 |
| MRVERSTL      | B*14     | ZMAT2    | zinc finger, matrin type 2                                           | n        | n.a. |      |     |     |     |     |
| DRFRNNSL      | B*14     | SAMSN1   | SAM domain, SH3 domain and nuclear localization signals 1            | n        | 1.2  | 0.2  | 1.2 | 0.9 | 1.7 | 0.2 |
| TPGIKGEKGLPGL | B*35     | C1QB     | complement component 1, q subcomponent, B chain                      | n        | 1.7  | 0.3  | 4.0 | 2.8 | 3.7 | 0.3 |
| INFDGHVVL     | n.a.     | CNTNAP2  | contactin associated protein-like 2                                  | n        | 39.4 | 48.5 | 1.4 | 0.9 | 1.1 | 0.8 |
| RPAGLPEKY     | B*35     | SAA2     | serum amyloid A2                                                     | n        | 0.9  | 0.1  | 0.2 | 0.0 | 0.1 | 0.2 |
| IYNEALKG      | n.a.     | S100A6   | S100 calcium binding protein A6                                      | 18620780 | 0.9  | 0.5  | 1.2 | 0.2 | 0.9 | 0.8 |
| DRTTISRAL     | B*14     | GOLGA2   | golgi autoantigen, golgin subfamily a, 2                             | n        | 1.9  | 1.5  | 1.9 | 1.6 | 2.3 | 2.1 |
| RVAPEEHPVL    | A*02     | ACTB     | actin, beta                                                          | n        | 0.7  | 0.6  | 0.9 | 0.9 | 1.0 | 0.9 |
| YEVSQKLD      | artefact | CNDP2    | CNDP dipeptidase 2 (metallopeptidase                                 | n        | 0.7  | 0.7  | 2.1 | 1.3 | 0.7 | 0.3 |

|              |          |          |                                                                    |          |      |     |     |     |     |     |  |
|--------------|----------|----------|--------------------------------------------------------------------|----------|------|-----|-----|-----|-----|-----|--|
|              |          |          | M20 family)                                                        |          |      |     |     |     |     |     |  |
| VPNVHGAL     | B*35     | PTBP1    | polypyrimidine tract binding protein 1                             | n        | 0.6  | 1.1 | 0.7 | 0.8 | 0.4 | 0.1 |  |
| DQVTHIRI     | B*14     | PTPN6    | protein tyrosine phosphatase, non-receptor type 6                  | 15870198 | 1.5  | 0.9 | 2.3 | 1.1 | 1.6 | 0.4 |  |
| ILMEHIHKL    | A*02     | RPL19    | ribosomal protein L19                                              | 16609016 | 1.4  | 1.1 | 1.0 | 1.1 | 1.1 | 1.1 |  |
| DRVAHMEF     | B*14     | SPTBN1   | spectrin, beta, non-erythrocytic 1                                 | n        | 0.5  | 1.6 | 1.1 | 0.4 | 0.9 | 0.7 |  |
| QLEDGRTLSDY  | A*01     | UBB      | ubiquitin B                                                        | n        | 0.6  | 0.5 | 0.8 | 0.3 | 0.7 | 0.7 |  |
| DRALRSFKL    | B*14     | HDLBP    | high density lipoprotein binding protein (vigilin)                 | n        | 1.4  | 1.7 | 2.0 | 1.1 | 2.0 | 1.3 |  |
| LLDQGQLNKY   | A*01     | CLTC     | clathrin, heavy chain (Hc)                                         | n        | 1.3  | 0.9 | 1.7 | 0.8 | 1.1 | 0.9 |  |
| DRMVGQVL     | B*14     | EIF2S3   | eukaryotic translation initiation factor 2, subunit 3 gamma, 52kDa | n        | 0.2  | 0.9 | 0.4 | 0.5 | 0.4 | 0.2 |  |
| LPFIHHEL     | B*35     | OSGIN1   | oxidative stress induced growth inhibitor 1                        | 16924236 | 8.6  | 0.9 | 0.5 | 0.2 | 0.2 | 0.8 |  |
| LRPIQALGTEY  | B*14     | FCGBP    | Fc fragment of IgG binding protein                                 | n        | 3.5  | 0.7 | 9.2 | 0.3 | 1.1 | 0.4 |  |
| DQVSRLVTI    | B*14     | UGDH     | UDP-glucose dehydrogenase                                          | 19676054 | 2.5  | 0.8 | 1.1 | 0.8 | 1.0 | 1.0 |  |
| LASVSTVLTSKY | B*35     | HBA1     | hemoglobin, alpha 1                                                | n        | 0.1  | 0.1 | 0.4 | 0.2 | 0.9 | 0.1 |  |
| VELDDLKDEL   | n.a.     | PDIA6    | protein disulfide isomerase family A, member 6                     | 17495932 | 1.0  | 1.7 | 1.7 | 1.4 | 1.1 | 0.8 |  |
| LRYPMVAVGL   | B*14     | RPL36    | ribosomal protein L36                                              | n        | 2.6  | 2.6 | 1.3 | 1.9 | 2.0 | 1.7 |  |
| DVELDDLKDEL  | A*02     | PDIA6    | protein disulfide isomerase family A, member 6                     | 17495932 | 1.0  | 1.7 | 1.7 | 1.4 | 1.1 | 0.8 |  |
| LVVYPWTQRF   | artefact | HBB      | hemoglobin, beta                                                   | n        | 0.1  | 0.1 | 0.3 | 0.1 | 0.9 | 0.1 |  |
| GFSDEGGWLTRL | A*01     | SQSTM1   | sequestosome 1                                                     | (17)     | 3.2  | 0.6 | 0.9 | 1.0 | 0.6 | 1.3 |  |
| LRLLPFLGVL   | B*14     | CISD2    | CDGSH iron sulfur domain 2                                         | n        | n.a. |     |     |     |     |     |  |
| VVRHQLLKT    | A*02     | COX7C    | cytochrome c oxidase subunit VIIc                                  | n        | 1.5  | 0.7 | 1.4 | 0.9 | 1.1 | 2.3 |  |
| DRLNKKVVL    | B*14     | SNRNP200 | small nuclear ribonucleoprotein 200kDa (U5)                        | n        | 2.5  | 1.9 | 2.5 | 1.4 | 2.5 | 0.9 |  |
| FSDEGGWLTRL  | A*01     | SQSTM1   | sequestosome 1                                                     | (17)     | 3.2  | 0.6 | 0.9 | 1.0 | 0.6 | 1.3 |  |
| YLLPAIVHI    | A*02     | DDX5     | DEAD (Asp-Glu-Ala-Asp) box polypeptide 5                           | n        | 1.5  | 0.9 | 1.9 | 1.1 | 1.7 | 1.1 |  |
| LLPAGWILSHL  | A*02     | COX8A    | cytochrome c oxidase subunit 8A (ubiquitous)                       | n        | 1.2  | 0.8 | 1.3 | 0.9 | 0.8 | 1.2 |  |
| ERIDTRNEL    | B*14     | HSPA5    | heat shock 70kDa protein 5 (glucose-regulated protein, 78kDa)      | 16912156 | 1.1  | 1.1 | 1.9 | 1.7 | 1.1 | 0.7 |  |
| LQTTRQEL     | B*14     | PRPF19   | PRP19/PSO4 pre-mRNA processing factor 19 homolog (S. cerevisiae)   | n        | 2.5  | 2.8 | 3.0 | 2.6 | 1.6 | 1.7 |  |
| NRSIHRVF     | B*14     | PNPLA6   | patatin-like phospholipase domain                                  | n        | 1.0  | 1.3 | 2.6 | 0.7 | 0.9 | 1.0 |  |

|            |          |                 |                                                                  |             |      |       |      |     |      |     |
|------------|----------|-----------------|------------------------------------------------------------------|-------------|------|-------|------|-----|------|-----|
|            |          |                 | containing 6                                                     |             |      |       |      |     |      |     |
| NLFQHQII   | A*02     | ZNF7            | zinc finger protein 7                                            | n           | 6.1  | 4.6   | 4.6  | 4.0 | 3.7  | 4.3 |
| VRHGRSLAL  | B*14     | GCN1L1          | GCN1 general control of amino-acid synthesis 1-like 1 (yeast)    | n           | 1.7  | 2.5   | 2.6  | 4.0 | 2.1  | 2.8 |
| LIDVGFTDDV | A*02     | KIAA0174 / IST1 | KIAA0174 (MAPK activating protein PM28)                          | 19001599    | 1.3  | 1.1   | 1.1  | 0.9 | 1.2  | 1.1 |
| NPLEHKT    | B*35     | ARHGAP26        | Rho GTPase activating protein 26                                 | 10908648    | 1.4  | 2.0   | 2.1  | 0.7 | 2.0  | 0.4 |
| KTDLHNEGY  | A*01     | RFTN1           | raftlin, lipid raft linker 1                                     | n           | 0.7  | 0.2   | 1.4  | 0.4 | 2.1  | 0.4 |
| SRVIRNAL   | B*14     | NCKAP1L         | NCK-associated protein 1-like                                    | 17875758    | 9.2  | 3.0   | 18.4 | 8.6 | 18.4 | 9.8 |
| SMVKHIAL   | A*02     | LGR5            | leucine-rich repeat-containing G protein-coupled receptor 5      | 18688030    | 0.6  | 111.4 | 0.5  | 0.3 | 1.6  | 0.5 |
| DRLLALNSL  | B*14     | PRKDC           | protein kinase, DNA-activated, catalytic polypeptide             | (49) - (51) | 2.5  | 4.9   | 1.4  | 2.1 | 1.0  | 1.5 |
| ALPSRILLWK | A*03     | MXRA8           | matrix-remodelling associated 8                                  | n           | 1.2  | 0.3   | 1.9  | 0.2 | 8.6  | 1.1 |
| GEHTEALSCK | artefact | CDKL1           | cyclin-dependent kinase-like 1 (CDC2-related kinase)             | n           | 0.1  | 0.0   | 0.1  | 0.0 | 0.4  | 0.6 |
| HIHKSLIGK  | A*03     | H2AFV           | H2A histone family, member V                                     | n           | 0.8  | 2.5   | 1.4  | 1.0 | 1.4  | 3.0 |
| IYKGGTISR  | A*03     | GSN             | gelsolin (amyloidosis, Finnish type)                             | 9921973     | 1.1  | 0.6   | 2.8  | 0.6 | 3.7  | 1.6 |
| EEYTKLNTQ  | n.a.     | APOA1           | apolipoprotein A-I                                               | n           | 0.6  | 2.6   | 1.6  | 0.5 | 3.2  | 3.5 |
| KASGTLREY  | n.a.     | RPL18A          | ribosomal protein L18a                                           | n           | 0.9  | 0.8   | 0.5  | 0.8 | 0.6  | 0.5 |
| ATYHGSFSTK | A*03     | COL6A3          | collagen, type VI, alpha 3                                       | n           | 1.6  | 0.6   | 2.0  | 0.6 | 3.2  | 2.0 |
| KLDPVPAAR  | A*03     | PJA1            | praja 1                                                          | n           | 1.3  | 1.4   | 1.6  | 0.9 | 1.2  | 2.1 |
| EEVHDLERKY | B*44     | NAP1L4          | nucleosome assembly protein 1-like 4                             | n           | 3.2  | 3.0   | 2.6  | 2.5 | 2.1  | 2.8 |
| QLYWSHPRK  | A*03     | RPS29           | ribosomal protein S29                                            | 12705879    | 0.7  | 0.7   | 0.6  | 0.8 | 0.7  | 0.6 |
| QIFVKTLTGK | A*03     | RPS27A          | ribosomal protein S27a                                           | 1660345     | 1.3  | 1.2   | 1.1  | 1.1 | 1.2  | 1.3 |
| YYRYPTGESY | A*29     | PFKFB3          | 6-phosphofructo-2-kinase/fructose-2,6-biphosphatase 3            | 16115917    | 0.5  | 0.2   | 0.7  | 0.4 | 0.4  | 0.1 |
| NVIRDAVY   | A*03     | HIST2H4B        | histone cluster 2, H4b                                           | n           | 0.3  | 0.2   | 2.5  | 0.4 | 1.1  | 0.3 |
| GTMTGMLYK  | A*03     | TIMM23B         | translocase of inner mitochondrial membrane 23 homolog B (yeast) | n           | 1.2  | 1.6   | 1.5  | 1.9 | 1.6  | 1.1 |
| KLLNYAPLEK | A*03     | POLR2L          | polymerase (RNA) II (DNA directed) polypeptide L, 7.6kDa         | n           | 1.7  | 2.5   | 3.0  | 4.0 | 1.5  | 1.7 |
| IIAIPTGVK  | A*03     | MT-COI          | mitochondrially encoded cytochrome c oxidase I                   | n           | n.a. |       |      |     |      |     |
| GVAPFTIAR  | A*03     | COL6A3          | collagen, type VI, alpha 3                                       | n           | 1.6  | 0.6   | 2.0  | 0.6 | 3.2  | 2.0 |
| NEVSKIVQTY | B*44     | ACTN1           | actinin, alpha 1                                                 | n           | 2.3  | 2.8   | 2.8  | 3.0 | 2.3  | 2.0 |
| RLFVGSIPK  | A*03     | SYNCRIP         | synaptotagmin binding, cytoplasmic RNA interacting protein       | 19137262    | 3.0  | 6.5   | 1.7  | 2.0 | 2.5  | 7.0 |

|                  |          |          |                                                          |                  |      |     |     |     |     |      |
|------------------|----------|----------|----------------------------------------------------------|------------------|------|-----|-----|-----|-----|------|
| AYVHMTVTHF       | A*29     | TMBIM6   | transmembrane BAX inhibitor motif containing 6           | 16353209         | 0.8  | 0.7 | 1.4 | 0.8 | 0.8 | 0.7  |
| GVAPFTIAR        | A*03     | COL6A3   | collagen, type VI, alpha 3                               | n                | 1.6  | 0.6 | 2.0 | 0.6 | 3.2 | 2.0  |
| VTYVPVTTFK       | A*03     | RPL31    | ribosomal protein L31                                    | n                | 1.6  | 1.7 | 1.5 | 0.4 | 1.1 | 1.1  |
| GEHTLLVTV        | B*49     | C7orf59  | chromosome 7 open reading frame 59                       | n                | n.a. |     |     |     |     |      |
| REYQDLLNV        | B*49     | INA      | internexin neuronal intermediate filament protein, alpha | 12209604         | 3.0  | 0.1 | 0.4 | 0.5 | 0.4 | 0.1  |
| NYIDKVRFL        | A*29     | VIM      | vimentin                                                 | n                | 0.5  | 0.2 | 0.9 | 0.4 | 1.5 | 0.5  |
| KIADRFLLY        | A*03     | LMO4     | LIM domain only 4                                        | n                | 3.7  | 1.1 | 2.0 | 3.7 | 2.8 | 3.7  |
| ALPSRILLWK       | A*03     | MXRA8    | matrix-remodelling associated 8                          | n                | 1.2  | 0.3 | 1.9 | 0.2 | 8.6 | 1.1  |
| SEMHSFIQI        | B*49     | PYHIN1   | pyrin and HIN domain family, member 1                    | 15122330         | 1.1  | 0.4 | 1.0 | 0.8 | 1.1 | 0.5  |
| MPVGPDAILRY      | B*35     | BAT3     | HLA-B associated transcript 3                            | 18055229         | 0.9  | 1.9 | 1.7 | 1.9 | 1.1 | 1.6  |
| KEIFLRELI        | B*49     | HSP90B1  | heat shock protein 90kDa beta (Grp94), member 1          | 17545519         | 0.9  | 1.4 | 2.0 | 2.0 | 1.3 | 0.5  |
| APSAILPLPGQSVER  | DRB1*01  | ITIH4    | inter-alpha (globulin) inhibitor H4                      | n                | 7.0  | 0.4 | 1.9 | 0.9 | 9.8 | 18.4 |
| AILPLPGQSVER     | DRB1*01  | ITIH4    | inter-alpha (globulin) inhibitor H4                      | n                | 7.0  | 0.4 | 1.9 | 0.9 | 9.8 | 18.4 |
| PAILSEASAPIPH    | DRB1*01  | SDCBP    | syndecan binding protein (syntenin)                      | 18832467         | 0.5  | 0.4 | 0.7 | 0.9 | 0.9 | 0.4  |
| ARKLIGDPNLEF     | DRB1*15  | RAN      | RAN, member RAS oncogene family                          | (14), (22), (23) | 1.1  | 1.7 | 1.3 | 1.5 | 0.9 | 0.7  |
| WTTGTIISSQRF     | DRB1*01  | EPHX1    | epoxide hydrolase 1, microsomal (xenobiotic)             | (16)             | 3.0  | 0.2 | 1.2 | 0.1 | 0.8 | 1.3  |
| YDNEFGYSNRVVDL   | DRB1*15  | GAPDH    | glyceraldehyde-3-phosphate dehydrogenase                 | n                | 0.8  | 0.7 | 0.8 | 0.8 | 0.8 | 0.8  |
| VVYPWTQRF        | artefact | HBB      | hemoglobin, beta                                         | n                | 0.1  | 0.1 | 0.3 | 0.1 | 0.9 | 0.1  |
| LEEFGRAFSFEAQQ   | DRB1*15  | HLA-DPA1 | major histocompatibility complex, class II, DP alpha 1   | n                | 0.7  | 0.1 | 1.5 | 0.9 | 1.1 | 0.3  |
| SGTLVLLQGARGFA   | DRB1*01  | CD14     | CD14 molecule                                            | n                | 0.5  | 0.1 | 0.9 | 0.3 | 1.6 | 0.2  |
| IIVNWVNETLRE     | DRB1*15  | LCP1     | lymphocyte cytosolic protein 1 (L-plastin)               | 16287074         | 0.8  | 0.1 | 1.3 | 1.1 | 0.6 | 0.1  |
| TRQQDLVGLVLG     | DRB1*01  | GSQS6193 | GSQS6193                                                 | n                | n.a. |     |     |     |     |      |
| LVVYPWTQRF       | artefact | HBB      | hemoglobin, beta                                         | n                | 0.1  | 0.1 | 0.3 | 0.1 | 0.9 | 0.1  |
| LVVYPWTQRFFES    | DRB1*15  | HBB      | hemoglobin, beta                                         | n                | 0.1  | 0.1 | 0.3 | 0.1 | 0.9 | 0.1  |
| FSLPIKESEIIDF    | DRB1*01  | RPS2     | ribosomal protein S2                                     | 19138403         | 1.1  | 1.0 | 0.9 | 1.1 | 1.0 | 0.8  |
| DDIIVNWVNETLRE   | DRB1*15  | LCP1     | lymphocyte cytosolic protein 1 (L-plastin)               | 16287074         | 0.8  | 0.1 | 1.3 | 1.1 | 0.6 | 0.1  |
| NKMPSLSPIDKN     | DRB1*15  | MYO1B    | myosin IB                                                | n                | 1.2  | 1.0 | 2.5 | 0.4 | 1.6 | 0.3  |
| VTFLLPAGWILSHLET | DRB1*01  | COX8A    | cytochrome c oxidase subunit 8A                          | n                | 1.2  | 0.8 | 1.3 | 0.9 | 0.8 | 1.2  |

|                         |          |          |                                                        |            |      |     |     |     |     |     |
|-------------------------|----------|----------|--------------------------------------------------------|------------|------|-----|-----|-----|-----|-----|
|                         |          |          | (ubiquitous)                                           |            |      |     |     |     |     |     |
| GQSVVQLQGSRVVVG         | DRB1*01  | ITGAM    | integrin, alpha M                                      | 12485936   | 0.5  | 0.1 | 1.5 | 0.4 | 0.9 | 0.3 |
| EPVAVLKANRVWG           | DRB1*01  | HEXB     | hexosaminidase B (beta polypeptide)                    | n          | 1.7  | 1.1 | 3.7 | 5.3 | 2.5 | 1.1 |
| LVVYPWTQRF              | artefact | HBB      | hemoglobin, beta                                       | n          | 0.1  | 0.1 | 0.3 | 0.1 | 0.9 | 0.1 |
| SSEFVAASEQFLSTM         | DRB1*15  | DUOX1    | dual oxidase 1                                         | 18281478   | 2.1  | 0.4 | 2.3 | 1.2 | 0.2 | 0.0 |
| FGRAFSFEAQQ             | DRB1*15  | HLA-DPA1 | major histocompatibility complex, class II, DP alpha 1 | n          | 0.7  | 0.1 | 1.5 | 0.9 | 1.1 | 0.3 |
| KTGKLVSLSAQNLVD         | DRB1*01  | CTSS     | cathepsin S                                            | 16550604   | 2.6  | 0.9 | 4.3 | 2.5 | 3.5 | 0.3 |
| QVTQPTVGMNFKTPRGP       | DRB1*01  | RPS17    | ribosomal protein S17                                  | n          | 0.8  | 0.7 | 0.6 | 0.8 | 0.9 | 0.8 |
| GPTEEIRALHAAIGGIP       | DRB1*01  | NAPSA    | napsin A aspartic peptidase                            | (15), (24) | n.a. |     |     |     |     |     |
| SPNIVIALAGNKAFDL        | DRB1*01  | RAB5C    | RAB5C, member RAS oncogene family                      | n          | 1.5  | 1.1 | 2.5 | 1.2 | 2.3 | 1.0 |
| ANWVGKVNVDVGGGAL<br>GRL | DRB1*15  | HBB      | hemoglobin, beta                                       | n          | 0.1  | 0.1 | 0.3 | 0.1 | 0.9 | 0.1 |
| VSGTLVLLQGARGFA         | DRB1*01  | CD14     | CD14 molecule                                          | n          | 0.5  | 0.1 | 0.9 | 0.3 | 1.6 | 0.2 |
